# Supplementary material for: Desmetramadol Has the Safety and Analgesic Profile of Tramadol Without Its Metabolic Liabilities: Consecutive Randomized, Double-Blind, Placebo- and Active Comparator-Controlled Trials
Source: Elsevier journal article supplement (doi:10.1016/j.jpain.2019.04.005), 2019-04-18
Supplement: mmc4 [file mmc4.pdf]

**Supplementary Table 3. Measures of Cold-Induced Pain**

| <i>PAIN MEASURE</i>               | <i>TRAMADOL<br/>VERSUS<br/>PLACEBO</i> | <i>DESMETRAMADOL<br/>VERSUS<br/>PLACEBO</i> | <i>DESMETRAMADOL<br/>VERSUS<br/>TRAMADOL</i> |
|-----------------------------------|----------------------------------------|---------------------------------------------|----------------------------------------------|
| Trial A ( <i>n</i> = 43, males)   |                                        |                                             |                                              |
| Pain intensity, 0-10, MPD (SE)    |                                        |                                             |                                              |
| At 30 seconds                     | -0.46 (0.19)<br><i>P</i> = 0.015       | -0.60 (0.15)<br><i>P</i> = 0.0019           | -0.12 (0.16)<br><i>P</i> = 0.5               |
| At first perception               | -0.21 (0.10)<br>NS                     | -0.15 (0.09)<br>NS                          | 0.07 (0.10)<br>NS                            |
| Time, seconds, MD (SE)            |                                        |                                             |                                              |
| Withdrawal                        | 12.4 (4.4)<br><i>P</i> = 0.0076        | 12.6 (3.8)<br><i>P</i> = 0.006              | 0.03 (4.4)<br><i>P</i> = 1.0                 |
| First pain                        | 2.1 (0.85)<br><i>P</i> = 0.029         | 2.6 (0.73)<br><i>P</i> = 0.0057             | 0.42 (0.93)<br><i>P</i> = 0.7                |
| Trial B ( <i>n</i> = 42, males)   |                                        |                                             |                                              |
| Pain intensity, 0-10, MPD (SE)    |                                        |                                             |                                              |
| At 30 seconds                     | -0.25 (0.26)<br><i>P</i> = NS          | -0.75 (0.28)<br><i>P</i> = 0.036            | -0.62 (0.20)<br><i>P</i> = 0.003             |
| At first perception               | -0.08 (0.15)<br>NS                     | -0.17 (0.14)<br>NS                          | -0.09 (0.13)<br>NS                           |
| Time, seconds, MPD (SE)           |                                        |                                             |                                              |
| Withdrawal                        | 6.9 (1.6)<br><i>P</i> = 0.001          | 9.9 (1.9)<br><i>P</i> < 0.001               | 2.8 (2.4)<br><i>P</i> = 0.126                |
| First pain                        | 1.5 (0.5)<br><i>P</i> = 0.013          | 2.1 (0.5)<br><i>P</i> = 0.001               | 0.6 (0.6)<br><i>P</i> = 0.193                |
| Trial B ( <i>n</i> = 18, females) |                                        |                                             |                                              |
| Pain intensity, 0-10, MPD (SE)    |                                        |                                             |                                              |
| At 30 seconds                     | 0.03 (0.78)<br>NS                      | 0.28 (0.63)<br>NS                           | 0.09 (0.35)<br>NS                            |
| At first perception               | 0.01 (0.21)<br>NS                      | -0.24 (0.20)<br>NS                          | -0.26 (0.26)<br>NS                           |
| Time, seconds, MPD (SE)           |                                        |                                             |                                              |
| Withdrawal                        | 7.5 (4.2)<br>NS                        | 8.2 (5.3)<br>NS                             | 0.61 (8.0)<br>NS                             |
| First pain                        | 2.6 (1.2)<br>NS                        | 1.9 (0.8)<br>NS                             | -0.7 (1.5)<br>NS                             |

Abbreviations: MPD, mean paired difference; SE, standard error of the mean; NS, no significant treatment effect.
